# Supplementary material for: A Quasi-Experimental Study Examining the Impact and Challenges of Implementing a Fitness-Based Health Risk Assessment and a Physical Activity Counseling Intervention in the Workplace Setting
Source: PubMed Central journal article supplement — Health Serv Res Manag Epidemiol. 2019 Oct 31;6:2333392819884183. doi: 10.1177/2333392819884183 (PMC6826921; doi:10.1177/2333392819884183), 2019-10-31
Supplement: Supplementary_Material.pdf [file Supplementary_Material.pdf]

**Supplementary Table 1. Changes in Physical Activity in 10-minute bouts from the Multilevel Model<sup>a</sup>.**

|                                          | Total Physical Activity |                        | Moderate to Vigorous Physical Activity |                       | Light Physical Activity |                       |                       |
|------------------------------------------|-------------------------|------------------------|----------------------------------------|-----------------------|-------------------------|-----------------------|-----------------------|
|                                          | Model A <sup>b</sup>    | Model B <sup>c</sup>   | Model A <sup>b</sup>                   | Model B <sup>c</sup>  | Model A <sup>b</sup>    | Model B <sup>c</sup>  | Model C <sup>d</sup>  |
| <b>Fixed Effects</b>                     |                         |                        |                                        |                       |                         |                       |                       |
| Intercept                                | 62.44***<br>(8.72)      | 65.10***<br>(17.78)    | 36.88***<br>(8.34)                     | 34.48*<br>(16.84)     | 26.03***<br>(4.35)      | 26.53***<br>(7.22)    | 32.82***<br>(8.25)    |
| Time <sup>e</sup>                        | 18.81**<br>(6.03)       | 18.81**<br>(6.03)      | 10.18*<br>(5.00)                       | 10.11*<br>(5.00)      | 8.91*<br>(3.85)         | 8.90*<br>(3.81)       | -0.97<br>(7.51)       |
| Group <sup>f</sup>                       |                         | 6.78<br>(18.37)        |                                        | -3.55<br>(17.41)      |                         | 5.82<br>(7.00)        | 12.84<br>(8.51)       |
| Fitness Facility Membership <sup>g</sup> |                         | -7.89<br>(19.32)       |                                        | 5.84<br>(18.27)       |                         | -4.00<br>(7.40)       | -17.76 ~<br>(9.02)    |
| Age                                      |                         | 0.31<br>(0.86)         |                                        | 0.65<br>(0.82)        |                         | -0.25<br>(0.32)       | -0.26<br>(0.31)       |
| Time*Group                               |                         |                        |                                        |                       |                         |                       | -11.94<br>(7.61)      |
| Time*Membership                          |                         |                        |                                        |                       |                         |                       | 21.06*<br>(8.29)      |
| <b>Random Effects</b>                    |                         |                        |                                        |                       |                         |                       |                       |
| Residual                                 | 2496.12***<br>(492.20)  | 2496.91***<br>(492.70) | 1087.78**<br>(359.15)                  | 1078.84**<br>(353.55) | 799.32***<br>(152.69)   | 784.51***<br>(159.07) | 735.47***<br>(144.63) |
| Time                                     | 0                       | 0                      | 316.32<br>(272.91)                     | 321.14<br>(271.24)    | 120.15<br>(138.12)      | 114.88<br>(144.57)    | 124.52~<br>(83.34)    |
| Intercept                                | 619.53<br>(819.95)      | 807.47<br>(893.49)     | 1646.81*<br>(713.36)                   | 1792.25**<br>(763.19) | 0                       | 0                     | 0                     |
| Covariance                               | 1027.47**<br>(398.81)   | 1084.68***<br>(423.24) | 270.51<br>(310.31)                     | 350.15<br>(327.78)    | -10.32<br>(92.93)       | 21.60<br>(101.36)     | N/A                   |
| <b>Goodness of Fit Statistics</b>        |                         |                        |                                        |                       |                         |                       |                       |
| Deviance                                 | 1004.9                  | 978.7                  | 972.2                                  | 955.0                 | 881.5                   | 869.4                 | 849.3                 |
| AIC                                      | 1010.9                  | 993.7                  | 980.2                                  | 963.0                 | 887.5                   | 875.4                 | 853.5                 |
| BIC                                      | 1015.8                  | 998.6                  | 986.7                                  | 969.6                 | 892.4                   | 880.3                 | 856.6                 |

~  $p < .10$ , \*  $p < .05$ , \*\*  $p < .01$ , \*\*\*  $p < .001$

<sup>a</sup> Estimate (Standard Error)

<sup>b</sup> Model A, Unconditional Growth Model to determine the change in physical activity over time without level-2 predictors

<sup>c</sup> Model B, Conditional Growth Model to determine change over time when controlling for level-2 predictors

<sup>d</sup> Model C, Conditional Growth Model with group and gym membership as level-2 predictors on the impact of time. Random effects were not allowed to covary for this model

<sup>e</sup> Time, coded baseline, 0; 2-month, 1; 4-month, 2

<sup>f</sup> Group, coded PAC, 0; PAC+fHRA, 1

<sup>g</sup> Fitness Facility Membership, coded No Membership, 0; Membership, 1

**Supplementary Table 2. Mean Values of Physical Activity at Baseline and 4-months<sup>a</sup>**

|                                                 | <b>Baseline</b> | <b>2-months</b> | <b>4-months</b> |
|-------------------------------------------------|-----------------|-----------------|-----------------|
| <b>PAC (n=22)</b>                               |                 |                 |                 |
| TPA <sub>10Mins</sub> (mins/week) <sup>b</sup>  | 61 ± 12         | 61±19           | 113 ± 21        |
| MVPA <sub>10Mins</sub> (mins/week) <sup>c</sup> | 38 ± 12         | 30±16           | 62 ± 17         |
| LPA <sub>10Mins</sub> (mins/week) <sup>d</sup>  | 22 ± 4          | 30±10           | 51 ± 9          |
| <b>PAC+fHRA (n=16)</b>                          |                 |                 |                 |
| TPA <sub>10Mins</sub> (mins/week) <sup>b</sup>  | 72 ±12          | 66±23           | 107 ± 20        |
| MVPA <sub>10Mins</sub> (mins/week) <sup>c</sup> | 37 ± 11         | 37±14           | 66 ± 20         |
| LPA <sub>10Mins</sub> (mins/week) <sup>d</sup>  | 34 ± 8          | 29±12           | 41 ± 7          |

<sup>a</sup>Values expressed as mean ± standard error

<sup>b</sup>TPA<sub>10Min</sub>, total physical activity in bouts of 10 minutes or more

<sup>c</sup>MVPA<sub>10Mins</sub>, moderate to vigorous intensity physical activity in bouts of 10 minutes or more

<sup>d</sup>LPA<sub>10Mins</sub>, light intensity physical activity in bouts of 10 minutes or more

**Supplementary Figure 1. Change in Light Physical Activity per week for Participants with and without Fitness Facility Memberships<sup>a</sup>**

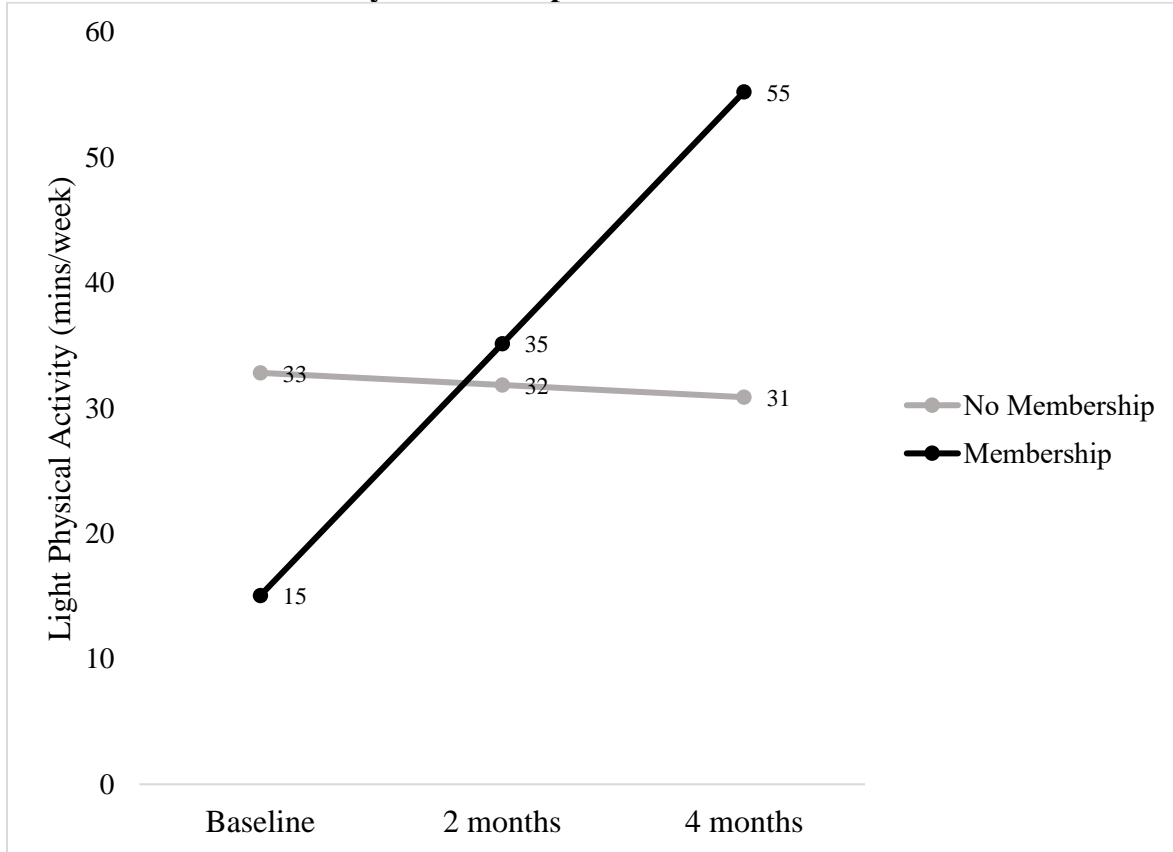

<sup>a</sup> Physical activity values for participants with an average age and in the Physical Activity Counseling group
